# Supplementary material for: Neurexin1α differentially regulates synaptic efficacy within striatal circuits
Source: bioRxiv or medRxiv preprint supplement (doi:10.1101/2020.05.31.125575), 2020-06-01

Supp. Figure 1

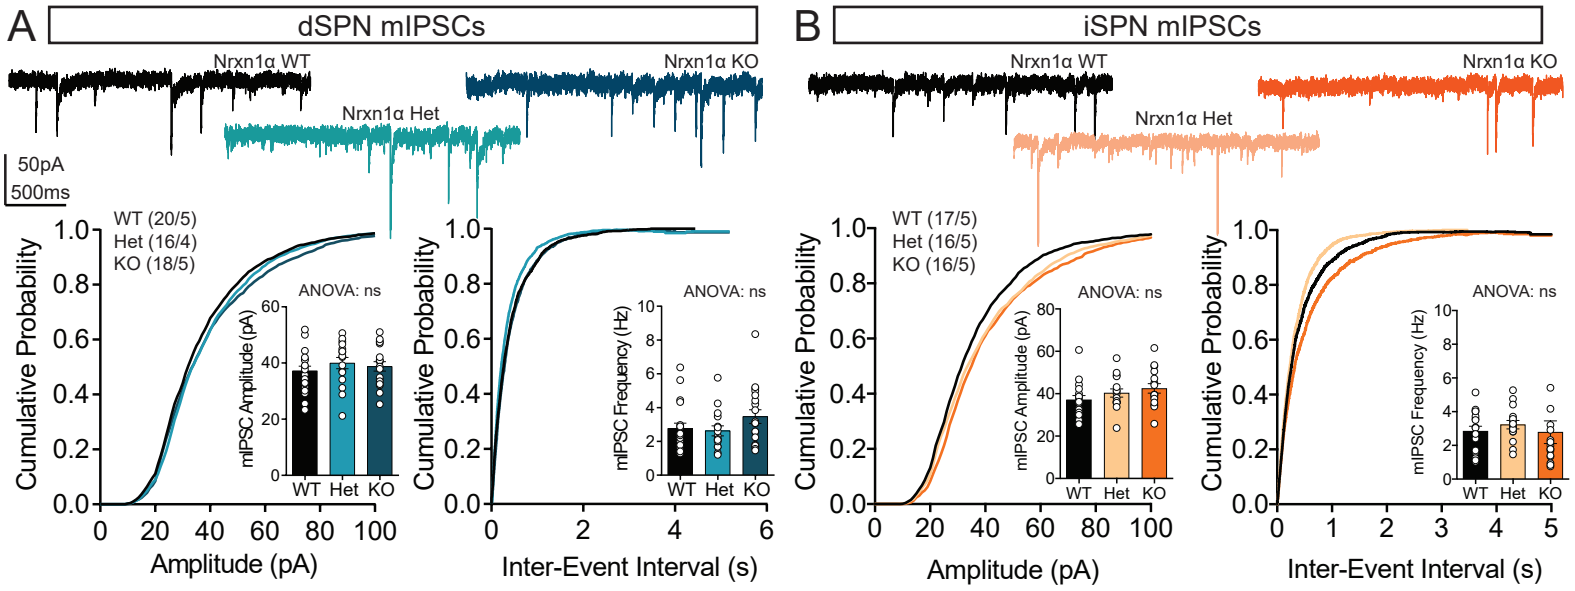

Supp. Figure 2

Wildtype dPFC → dSPNs (D1-TOM positive)

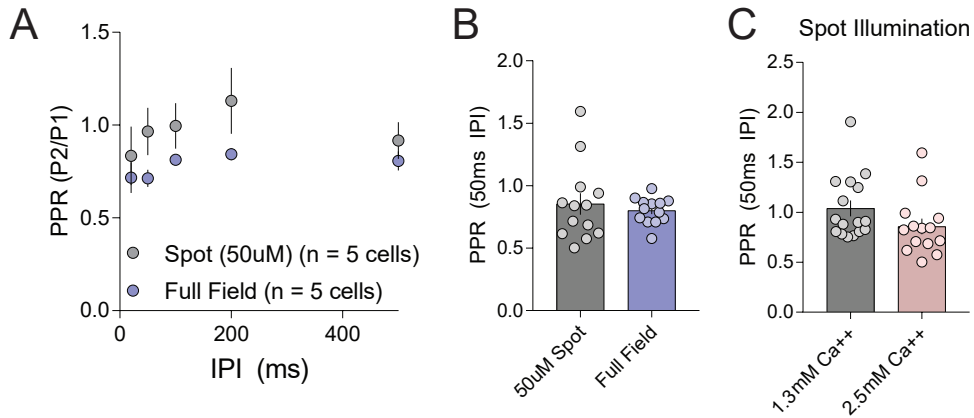

Spot Illumination (1.3mM Ca<sup>2+</sup>) dPFC → dSPNs (D1-TOM positive)

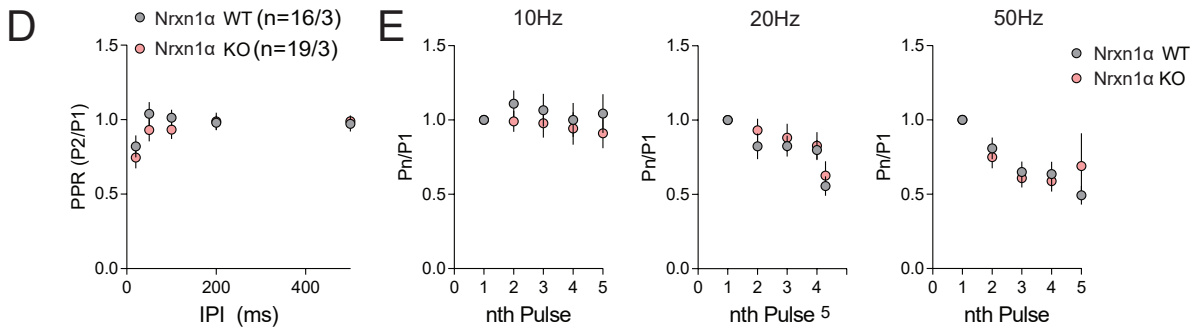

Supp. Figure 3

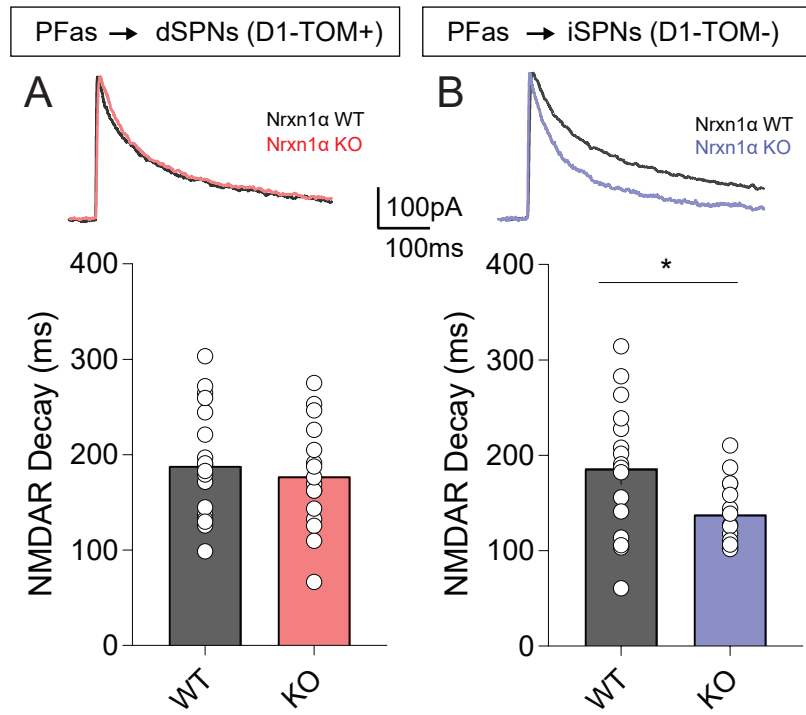

Supp. Figure 4

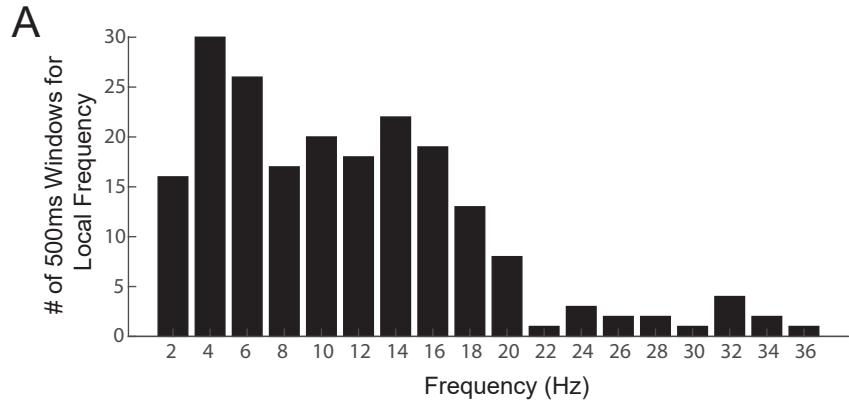

dPFC → dSPNs (D1-TOM positive)

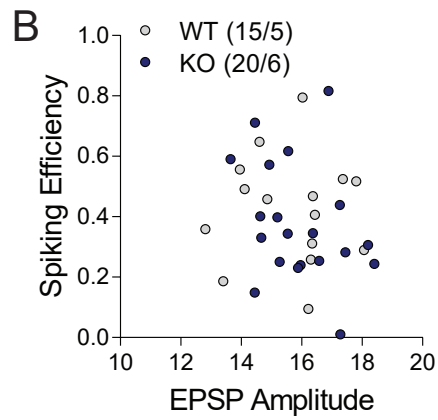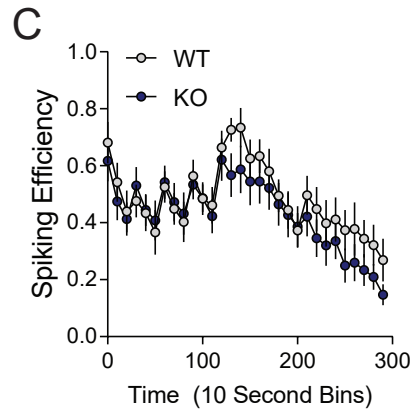

dPFC → iSPNs (D1-TOM negative)

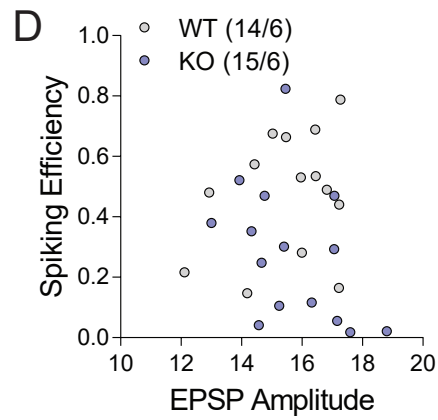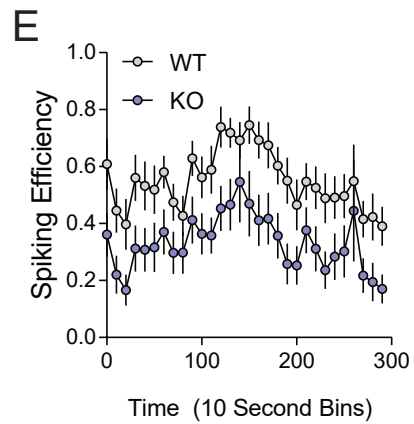

Supplement: Supplementary file [file media-1.pdf]
